# Supplementary material
Source: PubMed Central journal article supplement (PMC6899190)
Supplement: NIHMS1541596-supplement-1.pdf [file NIHMS1541596-supplement-1.pdf]

## **Structural basis of antagonism of human APOBEC3F by HIV-1 Vif**

Yingxia Hu<sup>1</sup>, Belete A. Desimmie<sup>2</sup>, Henry C. Nguyen<sup>1,3</sup>, Samantha J. Ziegler<sup>1</sup>, Tat Cheung Cheng<sup>1,4</sup>, John Chen<sup>2</sup>, Jia Wang<sup>5</sup>, Hongwei Wang<sup>5</sup>, Kai Zhang<sup>1</sup>, Vinay K. Pathak<sup>2,\*</sup>, and Yong Xiong<sup>1,\*</sup>

<sup>1</sup>Department of Molecular Biophysics and Biochemistry, Yale University, New Haven, Connecticut 06511, USA;

<sup>2</sup>Viral Mutation Section, HIV Dynamics and Replication Program, Center for Cancer Research, National Cancer Institute at Frederick, Frederick, Maryland 21702, USA;

<sup>3</sup>Present address: Department of Biochemistry and Biophysics, University of California, San Francisco, San Francisco, California 94158, USA;

<sup>4</sup>Present address: IGBMC, CNRS, Illkirch 67404, France;

<sup>5</sup>School of Life Sciences, Tsinghua University, Haidian District, Beijing 100084, China

\*Corresponding authors. All correspondence should be addressed to: [yong.xiong@yale.edu](mailto:yong.xiong@yale.edu) or [pathakv@mail.nih.gov](mailto:pathakv@mail.nih.gov)

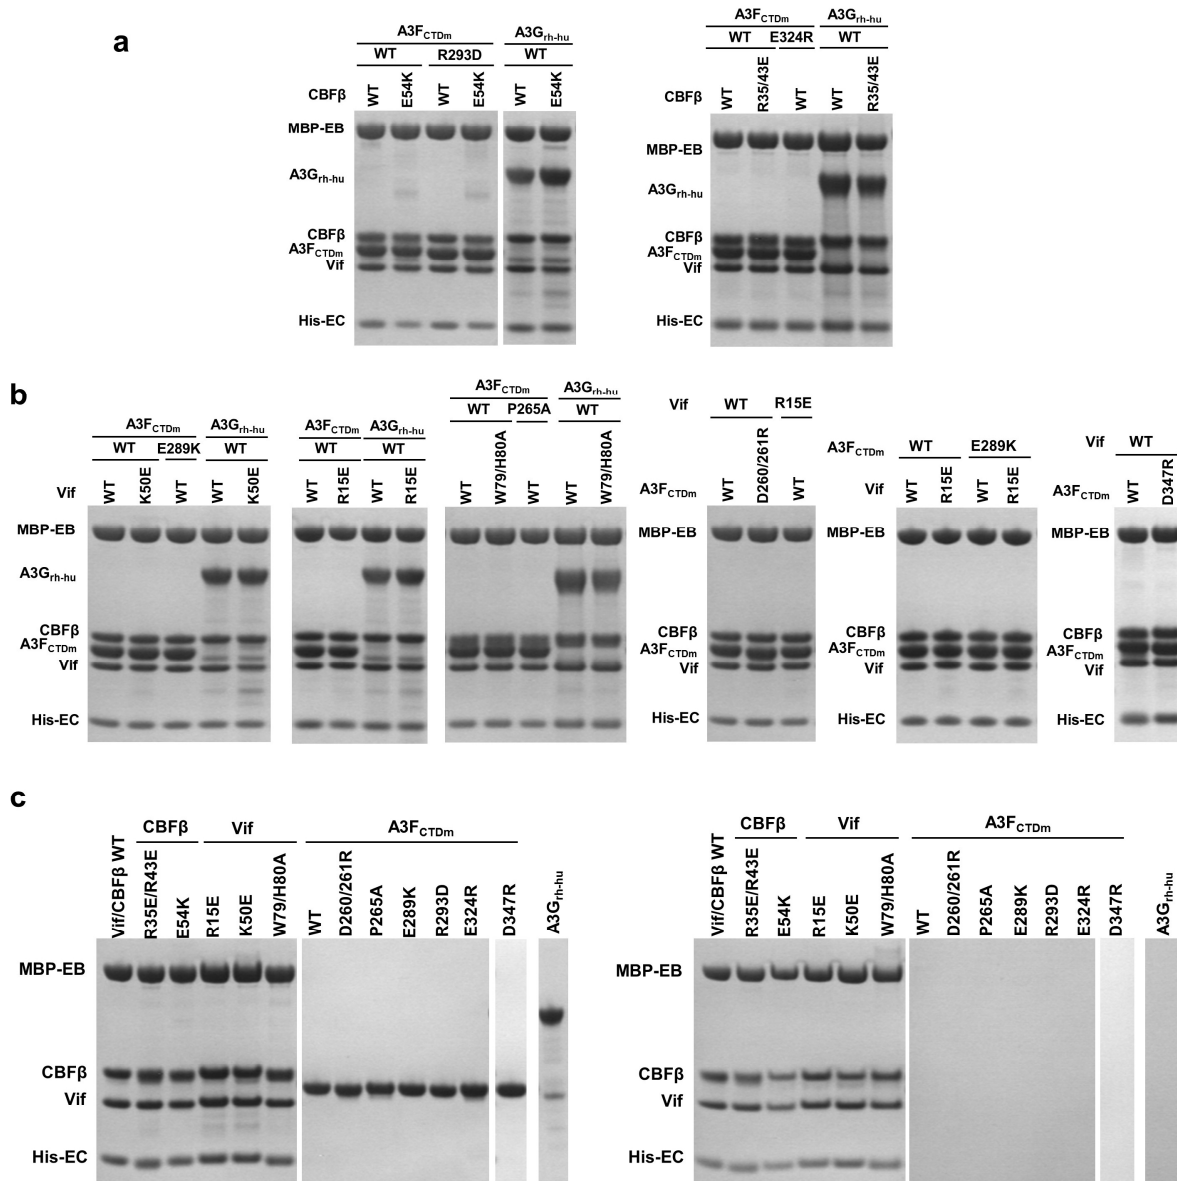

**Supplementary Fig. 1: The MBP column loading controls for the *in vitro* pull-down assay of the CBFβ-A3F interface (a) and the Vif-A3F interface (b), along with the loading (left) and elution (right) fractions of all Vif/CBFβ/EloB/EloC or A3F<sub>CTDm</sub> variants and A3G<sub>rh-hu</sub> alone (c).**
